# Supplementary material for: Extracellular matrix-related genes play an important role in the progression of NMIBC to MIBC: a bioinformatics analysis study
Source: Oxford University Press journal article supplement (doi:10.1042/bsr20194192), 2020-05-01
Supplement: bsr-2019-4192_supp.pdf [file bsr-2019-4192_supp.pdf]

**Supplementary Table 1** The clinicopathologic characteristics of the tumor samples

| <b>Characteristic</b>                           | <b>NMIBC(n=15)</b> | <b>MIBC(n=78)</b> |
|-------------------------------------------------|--------------------|-------------------|
| <b>Patient age at RC, median (range), years</b> | 69.1(57.4-88.5)    | 69.3(41.7-91.1)   |
| <b>Gender, number (%)</b>                       |                    |                   |
| <b>Female</b>                                   | 4(27%)             | 21(27%)           |
| <b>Male</b>                                     | 11(73%)            | 57(73%)           |
| <b>Histologic type</b>                          |                    |                   |
| <b>Transitional Cell Carcinoma(TCC)</b>         | 15(100%)           | 71(91%)           |
| <b>TCC/Squamous or CIS</b>                      | 0 (0)              | 7(9%)             |
| <b>RC stage, number (%)</b>                     |                    |                   |
| <b>pTa</b>                                      | 5(33%)             | \                 |
| <b>pT1</b>                                      | 10(67%)            | \                 |
| <b>pT2</b>                                      | \                  | 17(22%)           |
| <b>pT3</b>                                      | \                  | 42(54%)           |
| <b>pT4</b>                                      | \                  | 19(24%)           |
| <b>Lymph node status</b>                        |                    |                   |
| <b>pN0</b>                                      | 11(74%)            | 38(49%)           |
| <b>pN+</b>                                      | 2(13%)             | 26(33%)           |
| <b>pNx</b>                                      | 2(13%)             | 14(18%)           |

RC=Radical cystectomy

CIS=Carcinoma in situ

pNx=Lymph node dissection not done or no lymph nodes analyzed
